# Supplementary material for: Three-dimensional graphene–Co3O4 cathodes for rechargeable Li–O2 batteries
Source: Royal Society of Chemistry journal article supplement (doi:10.1039/c4ta05573j), 2014-11-19
Supplement: c4ta05573j1.pdf [file c4ta05573j1.pdf]

## Supplementary Information

# Three-Dimensional Graphene- $\text{Co}_3\text{O}_4$ Cathodes for Rechargeable Li- $\text{O}_2$ Batteries

Jiakai Zhang, Pengfa Li, Zhenhua Wang, Jinshuo Qiao, David Rooney, Wang Sun\* and Kening Sun\*

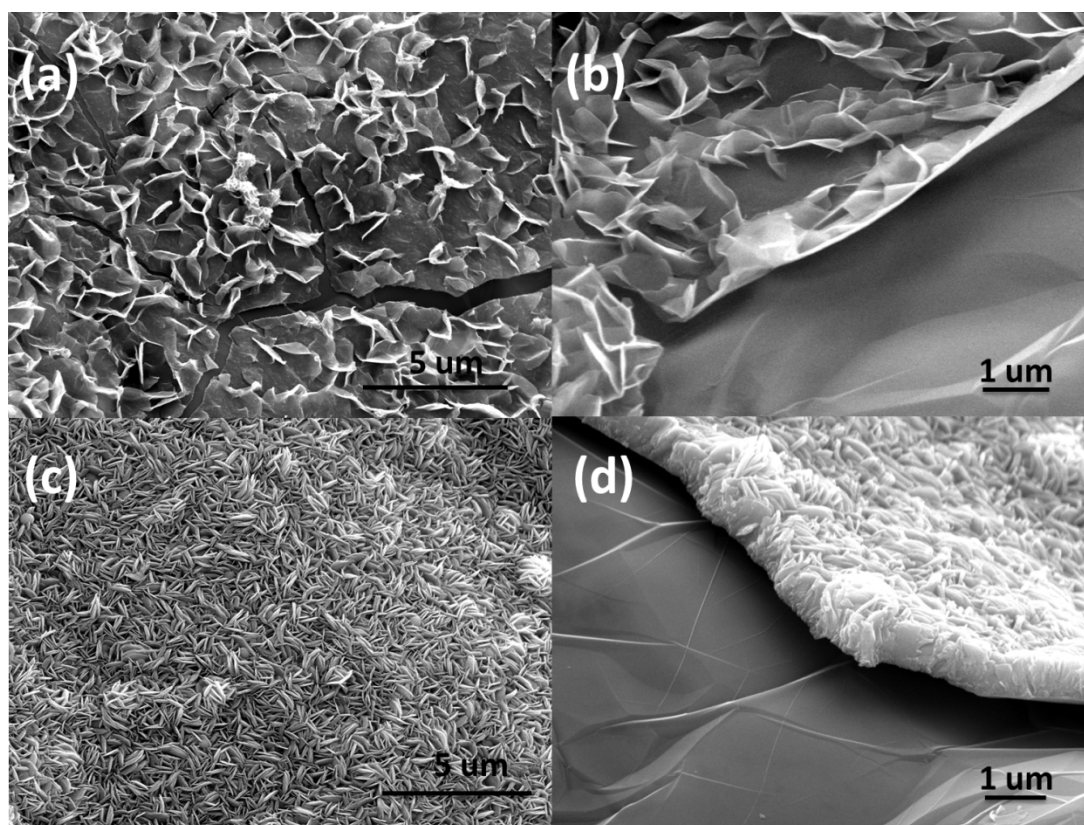

**Fig. S1** SEM images of 3D graphene- $\text{Co}_3\text{O}_4$  with different growing time of  $\text{Co}_3\text{O}_4$  nanosheets (a,b) 3h; (c,d) 9h.

**Table S1** BET and BJH results of graphene-Co<sub>3</sub>O<sub>4</sub> electrodes with different growing time of Co<sub>3</sub>O<sub>4</sub>

| Sample | BET surface area<br>(m <sup>2</sup> g <sup>-1</sup> ) | Pore volume<br>(cm <sup>3</sup> g <sup>-1</sup> ) | BJH average pore size<br>(nm) |
|--------|-------------------------------------------------------|---------------------------------------------------|-------------------------------|
| 0 h    | 10.49                                                 | 0.02                                              | 3.76                          |
| 3 h    | 28.815                                                | 0.05                                              | 3.38                          |
| 6 h    | 72.05                                                 | 0.12                                              | 2.19                          |
| 9 h    | 54.29                                                 | 0.03                                              | 3.82                          |

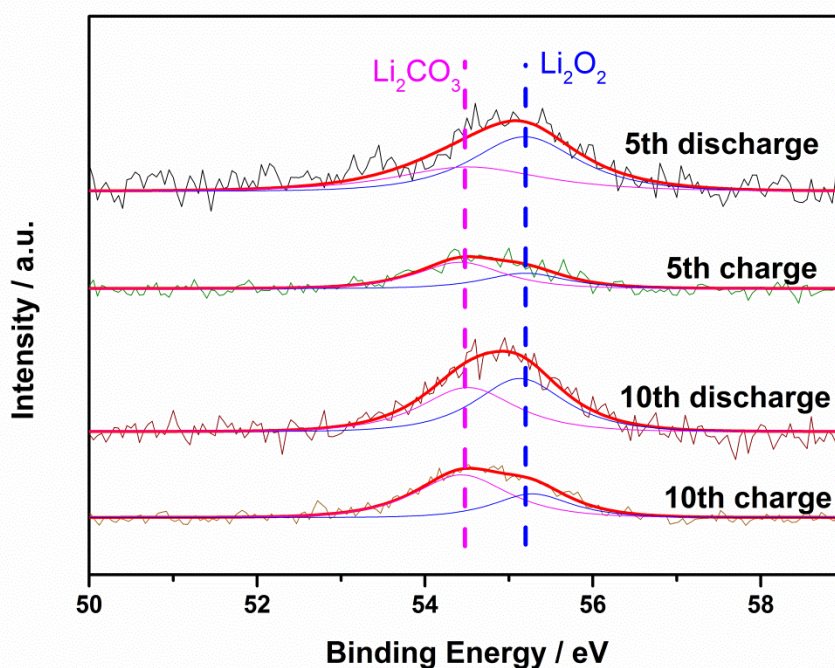

**Fig. S2** Li 1s XPS of the 3D graphene-Co<sub>3</sub>O<sub>4</sub> electrode after discharge-charge processes.
